# Supplementary material for: Acute kidney injury during pregnancy and puerperium: a retrospective study in a single center
Source: PubMed Central journal article supplement (PMC5412057; doi:10.1186/s12882-017-0551-4), 2017-05-01
Supplement: 12882_2017_551_MOESM1_ESM.pdf [file 12882_2017_551_MOESM1_ESM.pdf]

# Flowchart for the selection of patients \*

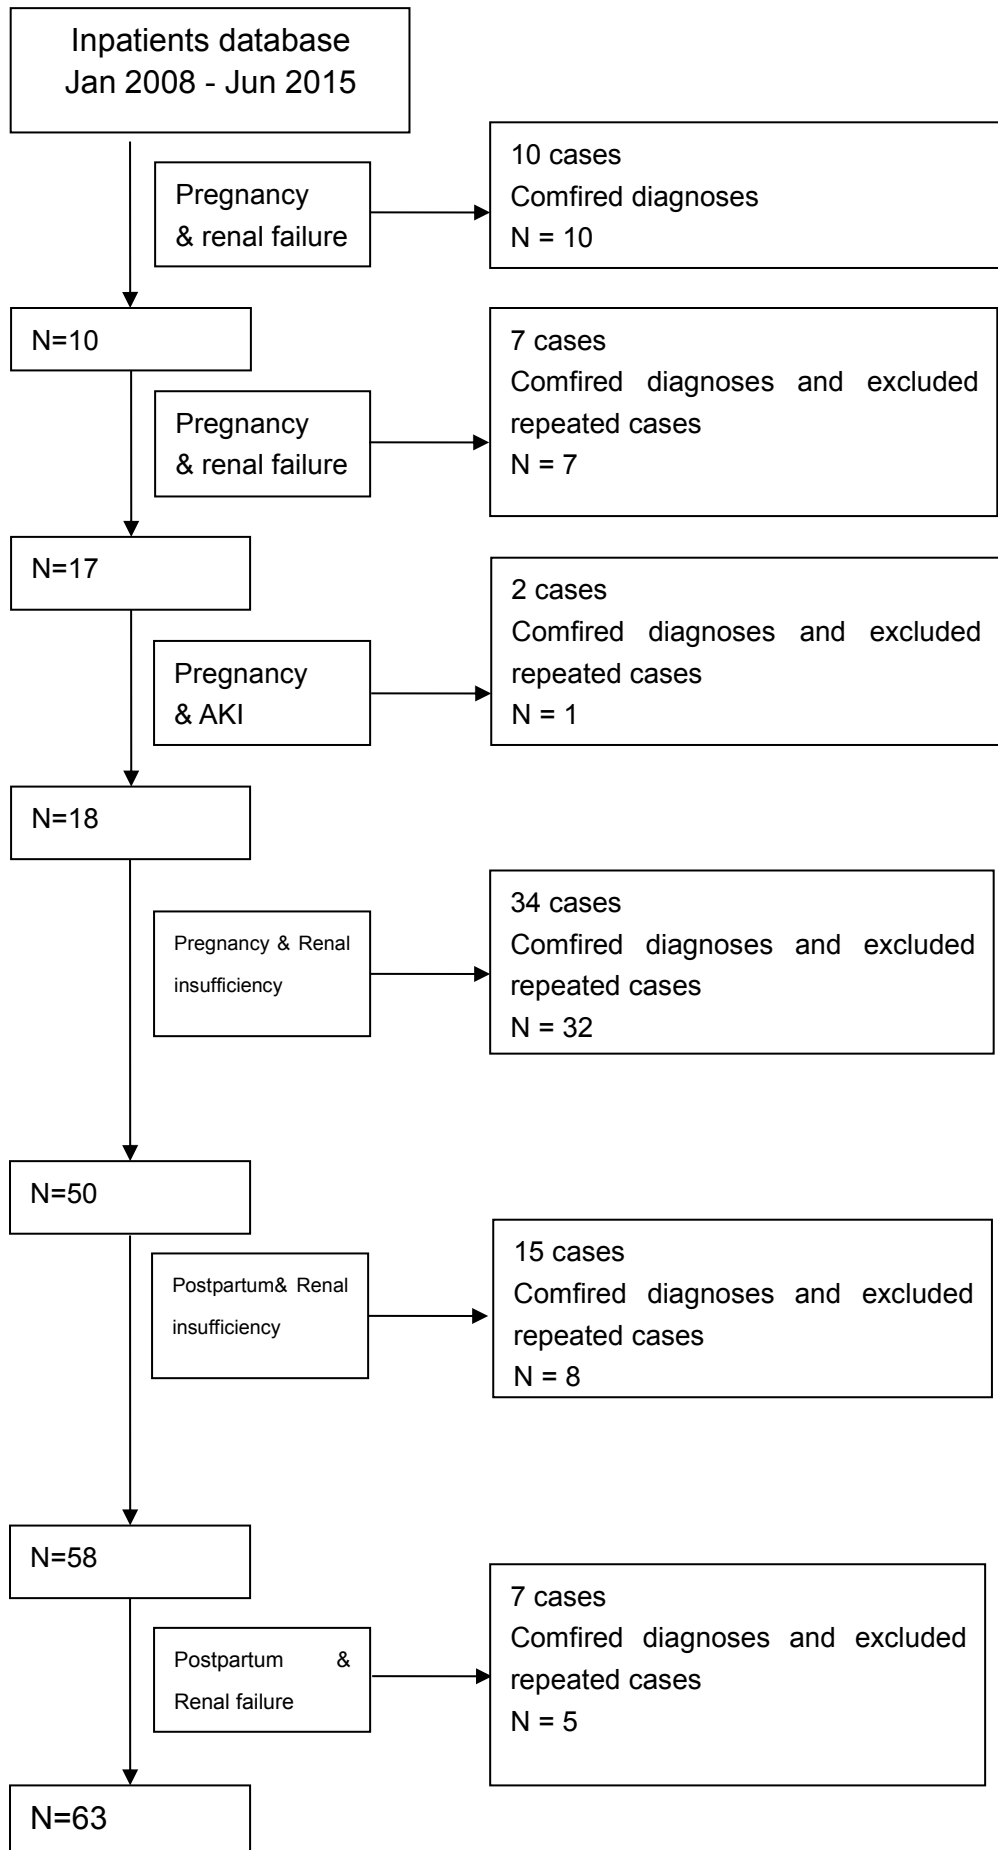

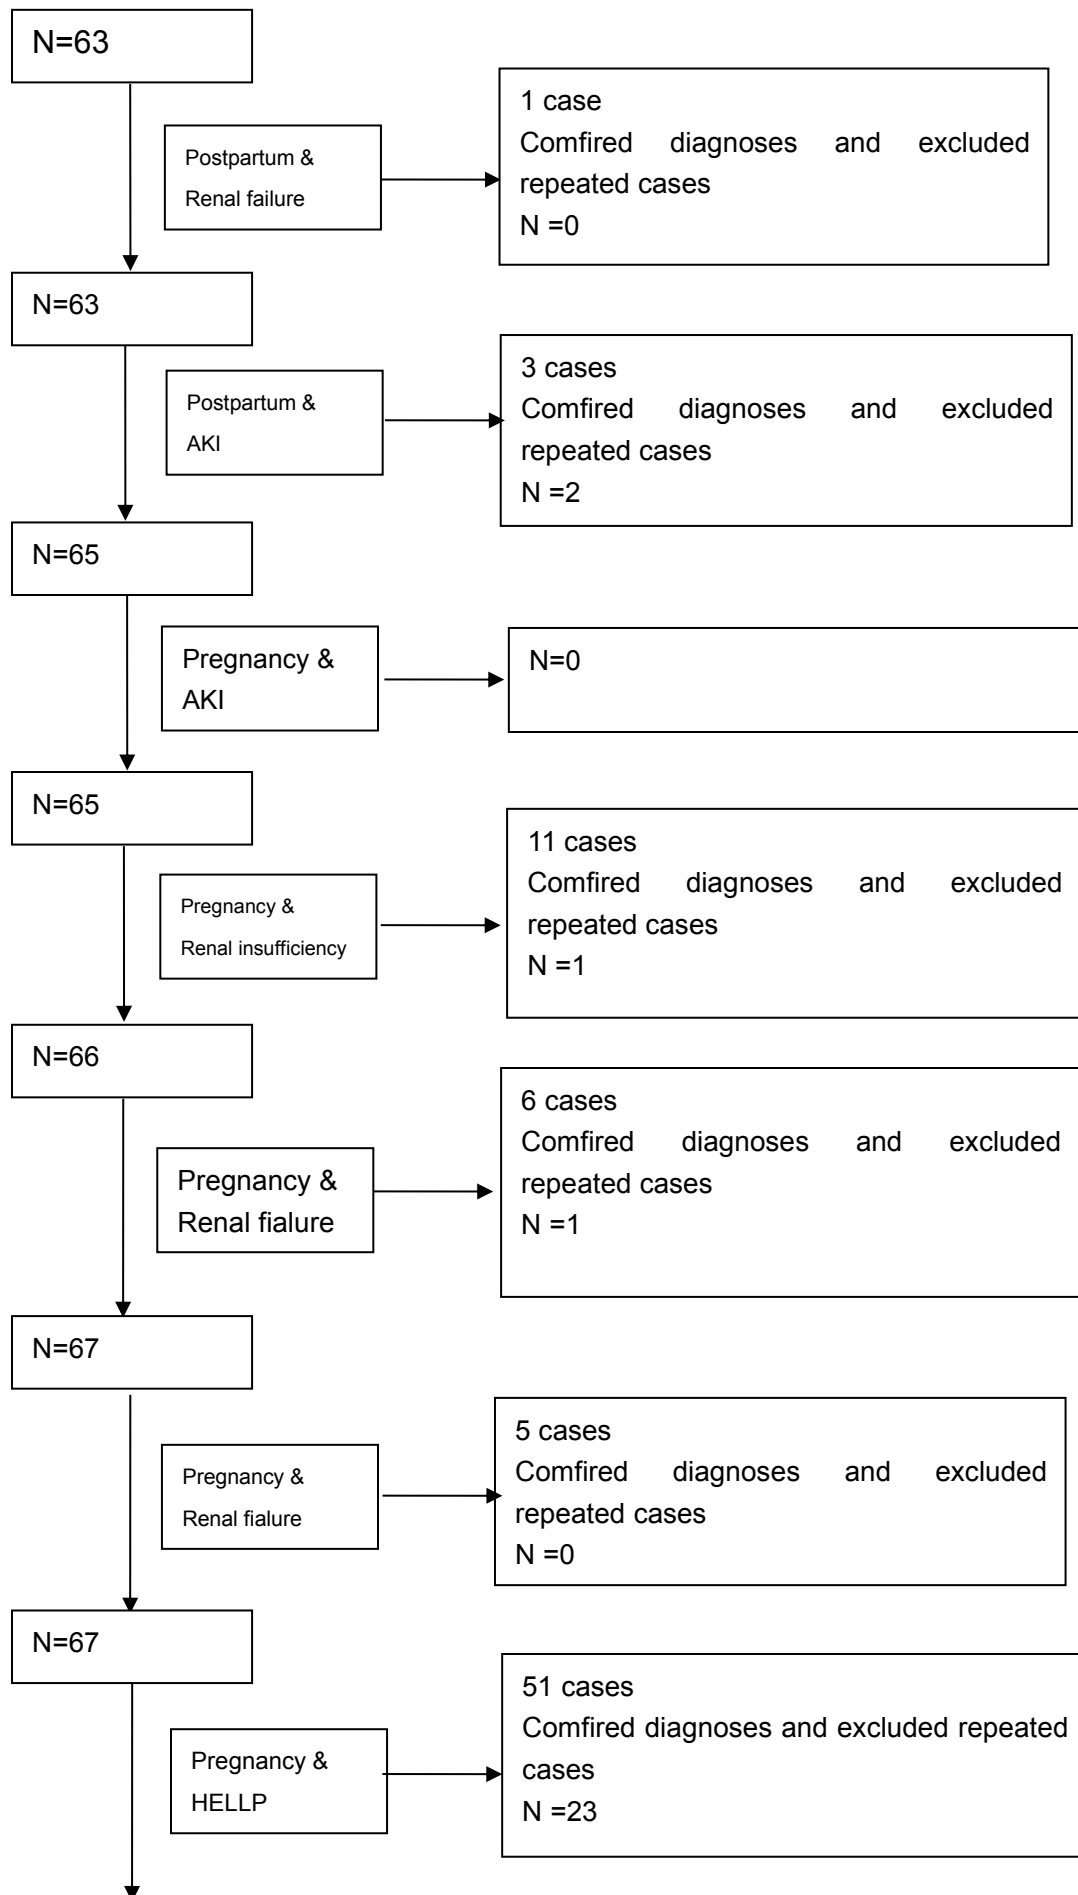

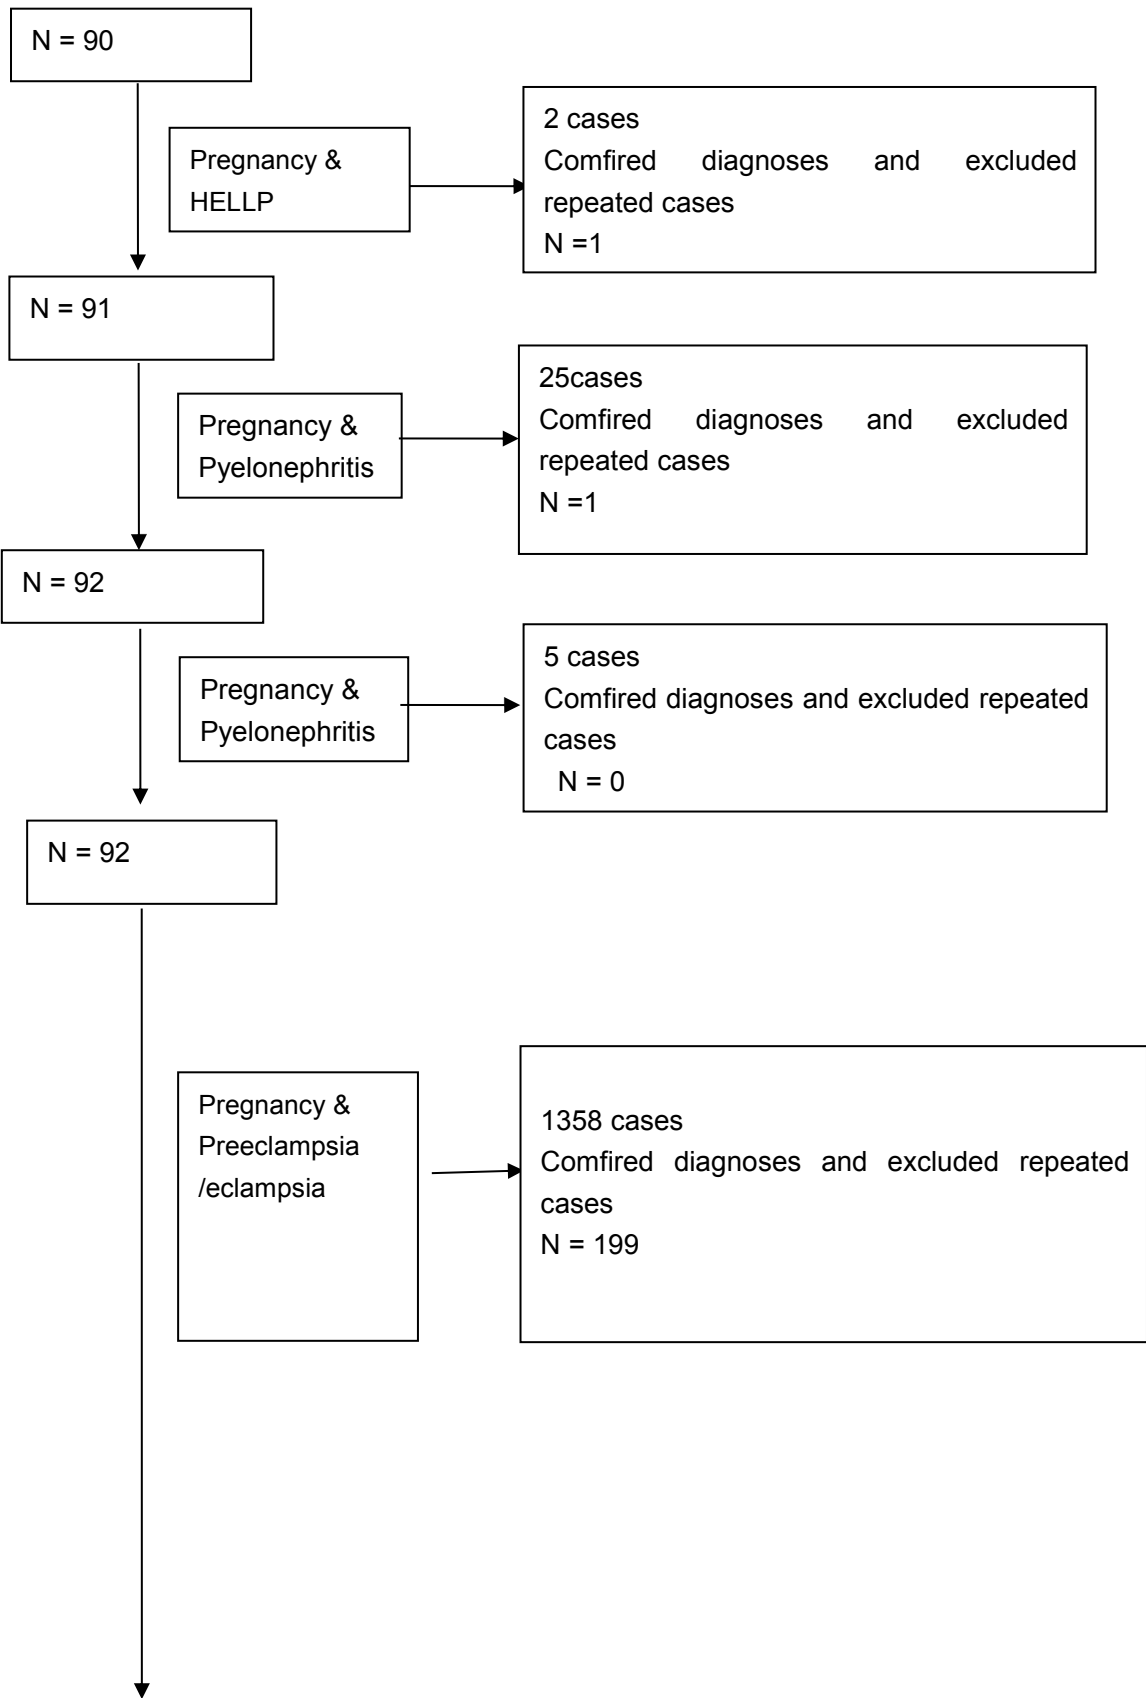

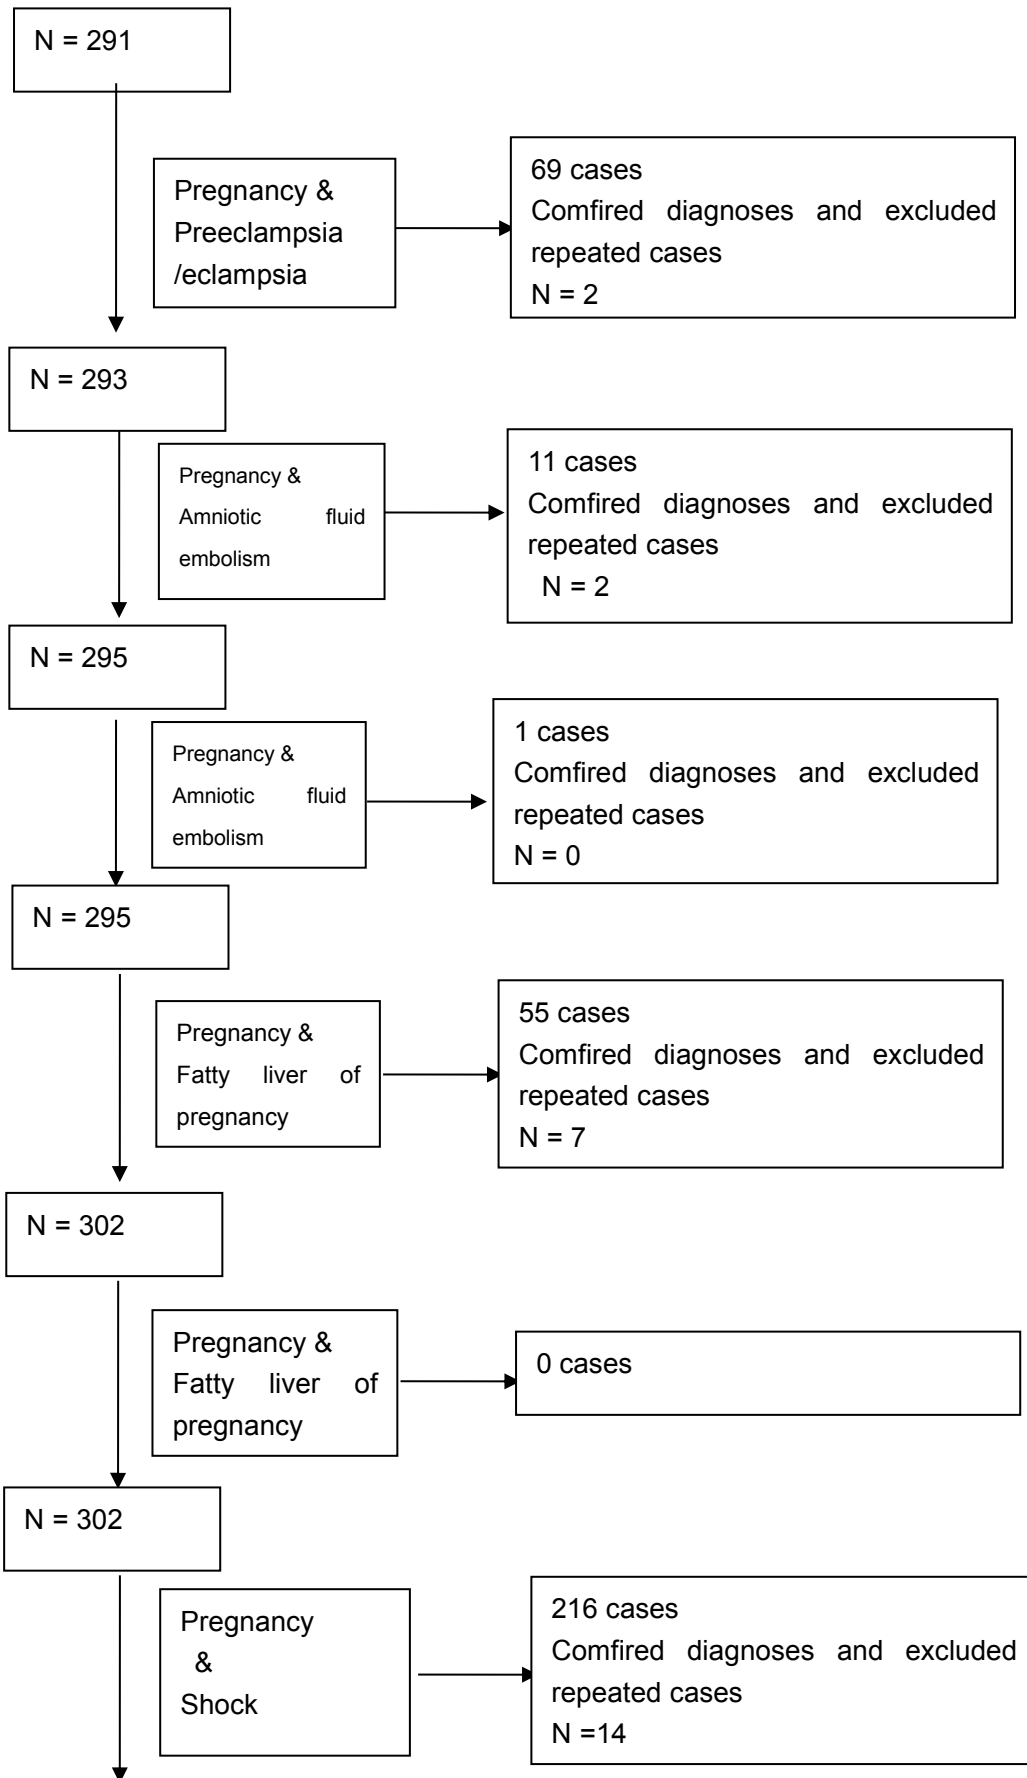

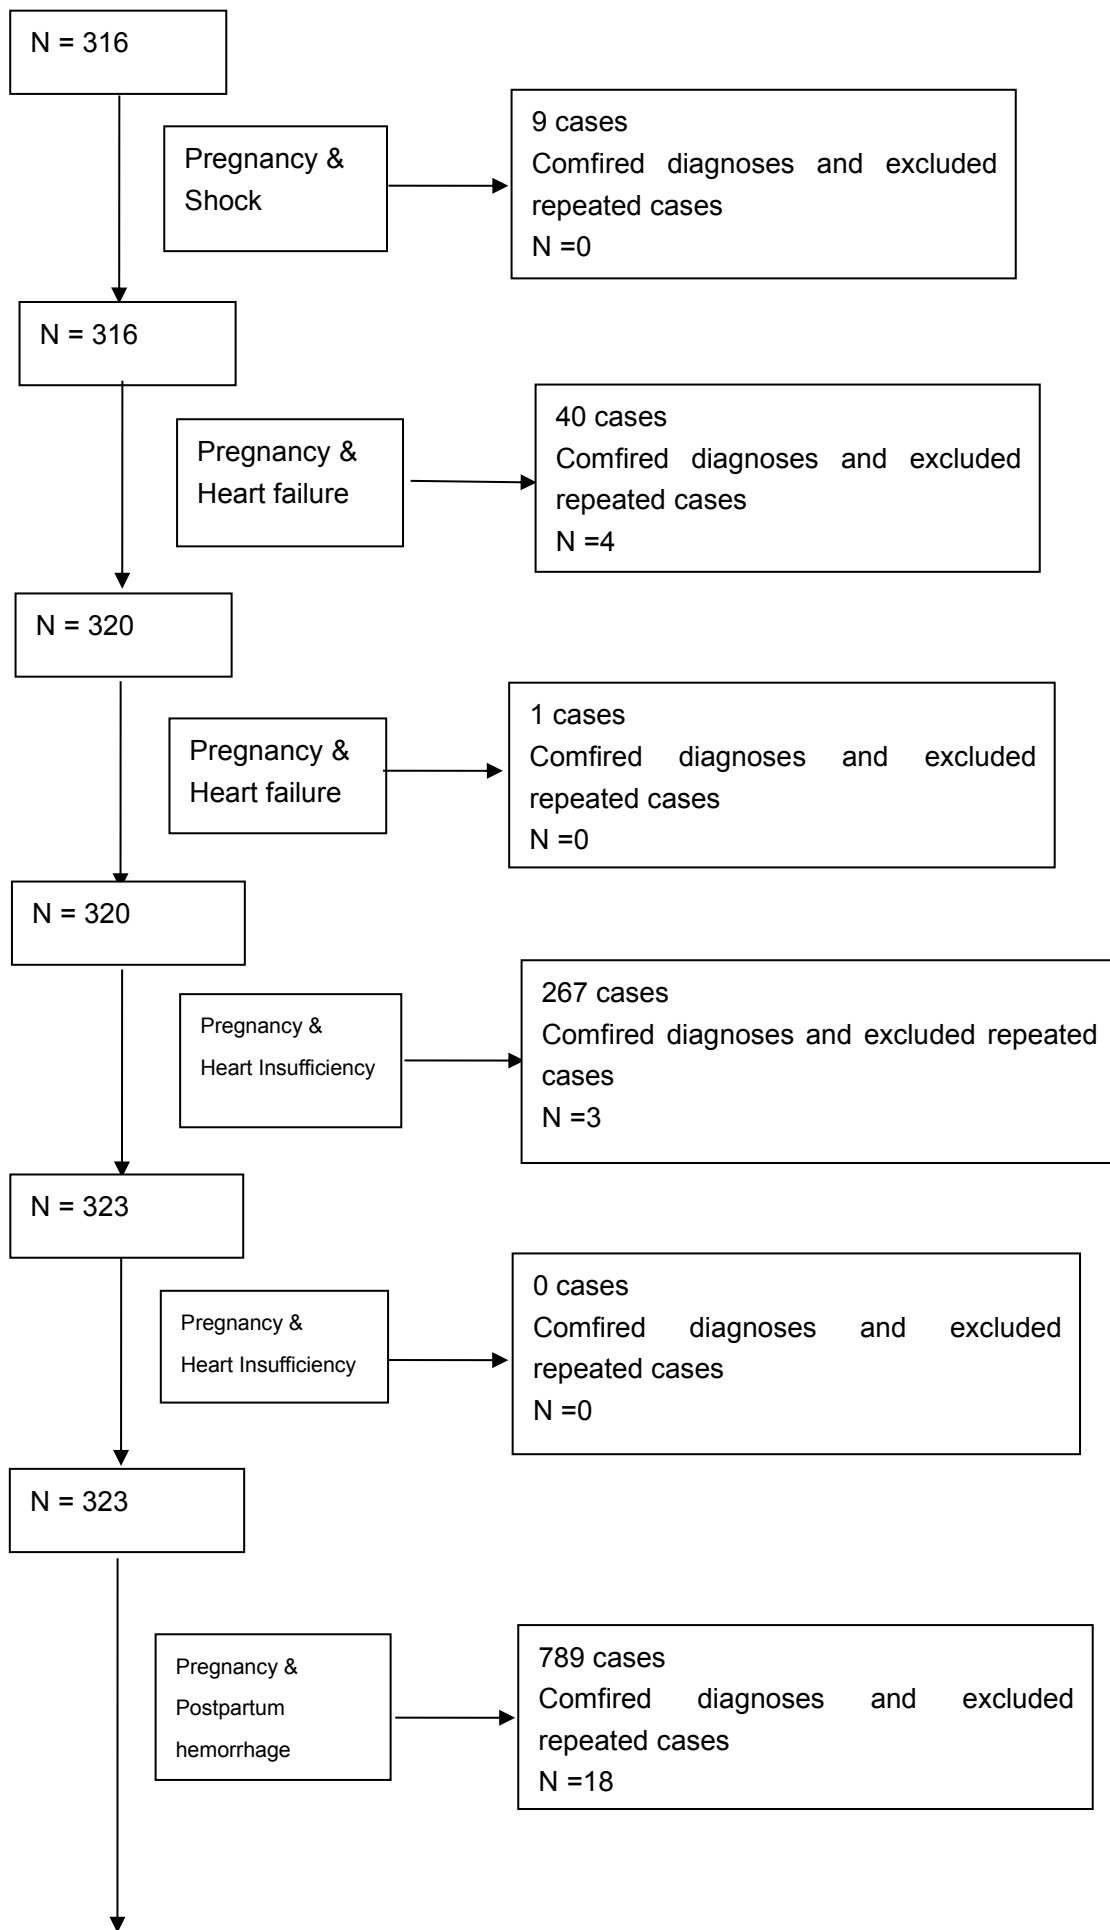

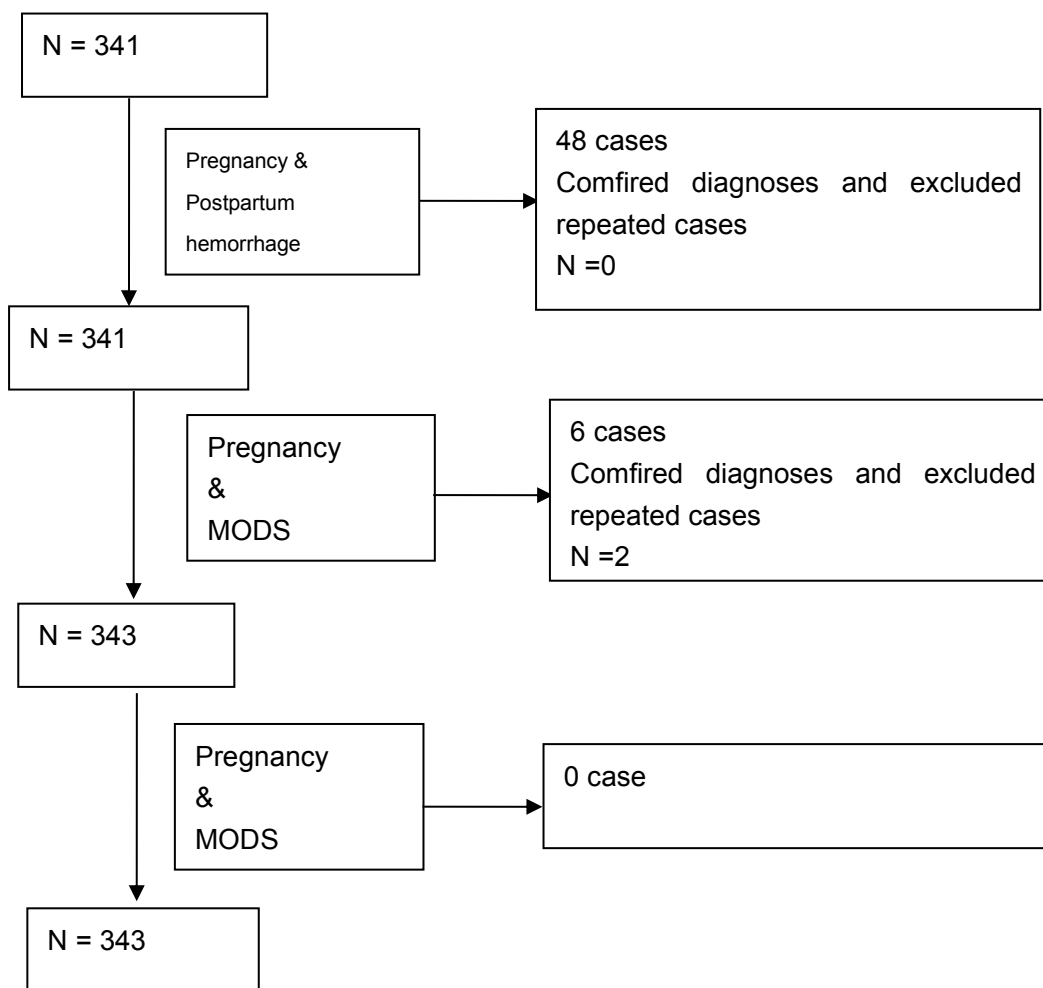

\* Two different Chinese characters are used to indicate pregnancy. Both of them were used in the flowchart. Renal failure was also expressed in two ways.
